# Supplementary material for: Polygenic Susceptibility of Aortic Aneurysms Associates to the Diameter of the Aneurysm Sac: the Aneurysm-Express Biobank Cohort
Source: PubMed Central journal article supplement (PMC6934821; doi:10.1038/s41598-019-56230-3), 2019-12-27
Supplement: 41598_2019_56230_MOESM1_ESM.pdf [file 41598_2019_56230_MOESM1_ESM.pdf]

## **Supplementary material**

**Manuscript title:** Polygenic Susceptibility of Aortic Aneurysms Associates to the Diameter of the Aneurysm Sac: the Aneurysm-Express Biobank Cohort.

**Authors:** van Laarhoven CJHCM, van Setten J, van Herwaarden JA, Pasterkamp G, de Kleijn DPV, de Borst GJ, van der Laan SW.

### **Contents:**

- Supplemental Figure 1
- Supplemental Figure 2
- Supplemental Table 1
- Supplemental Table 2
- Supplemental Table 3
- Supplemental Table 4
- Supplemental Table 5

# Supplemental Figure 1

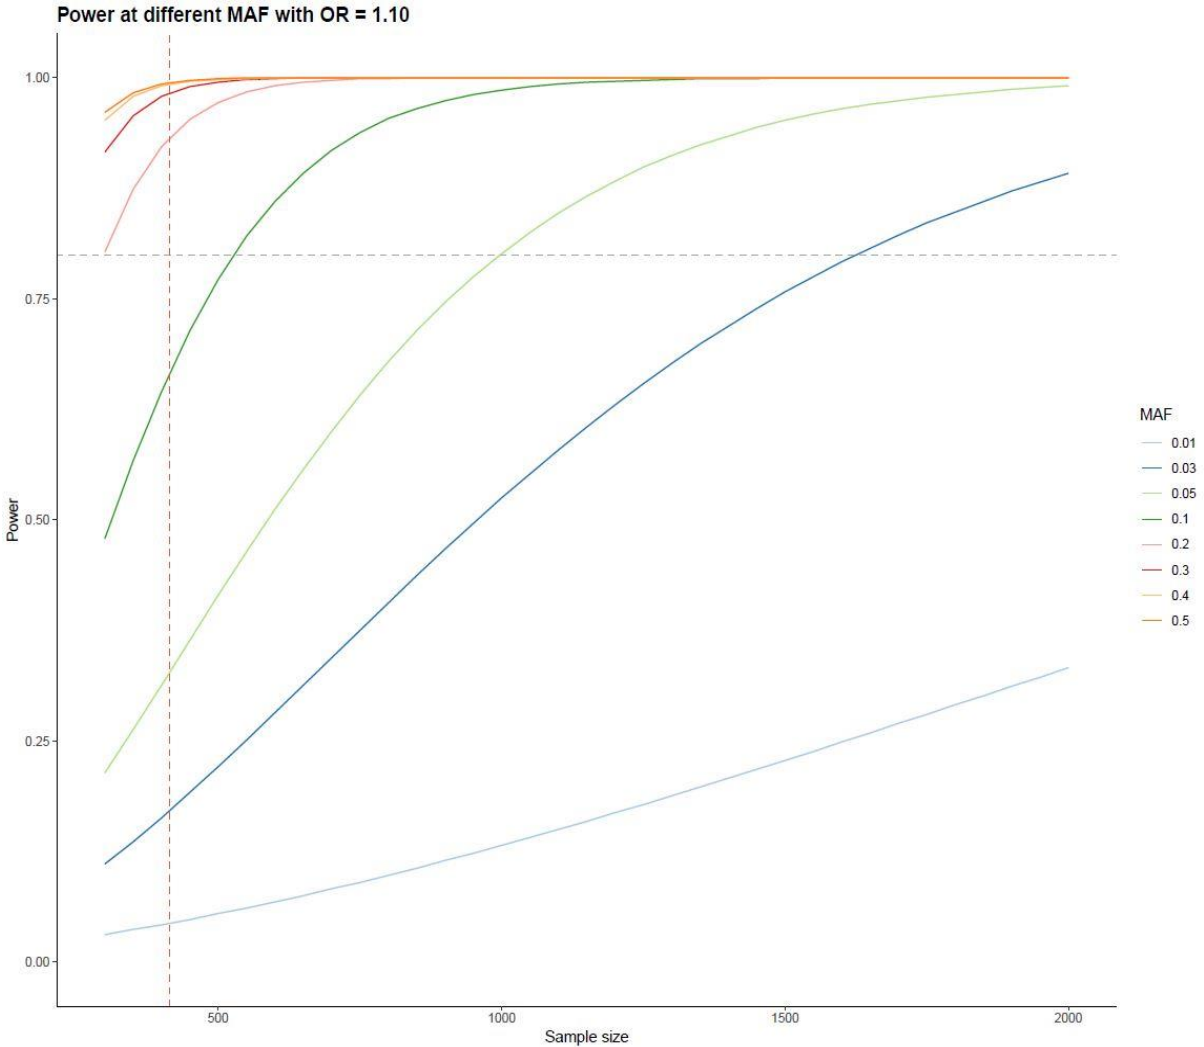

**Supplemental Figure 1.** Plot indicating study power estimates at different minor allele frequencies (MAF), with an average odds ratio (OR) of 1.10. Each solid colored line indicates a different MAF. Red dashed line indicates present study size of 415 samples, grey dashed line indicates a power estimate of  $\pm 80\%$  for risk variants MAF < 0.2.

**Supplemental Figure 2**

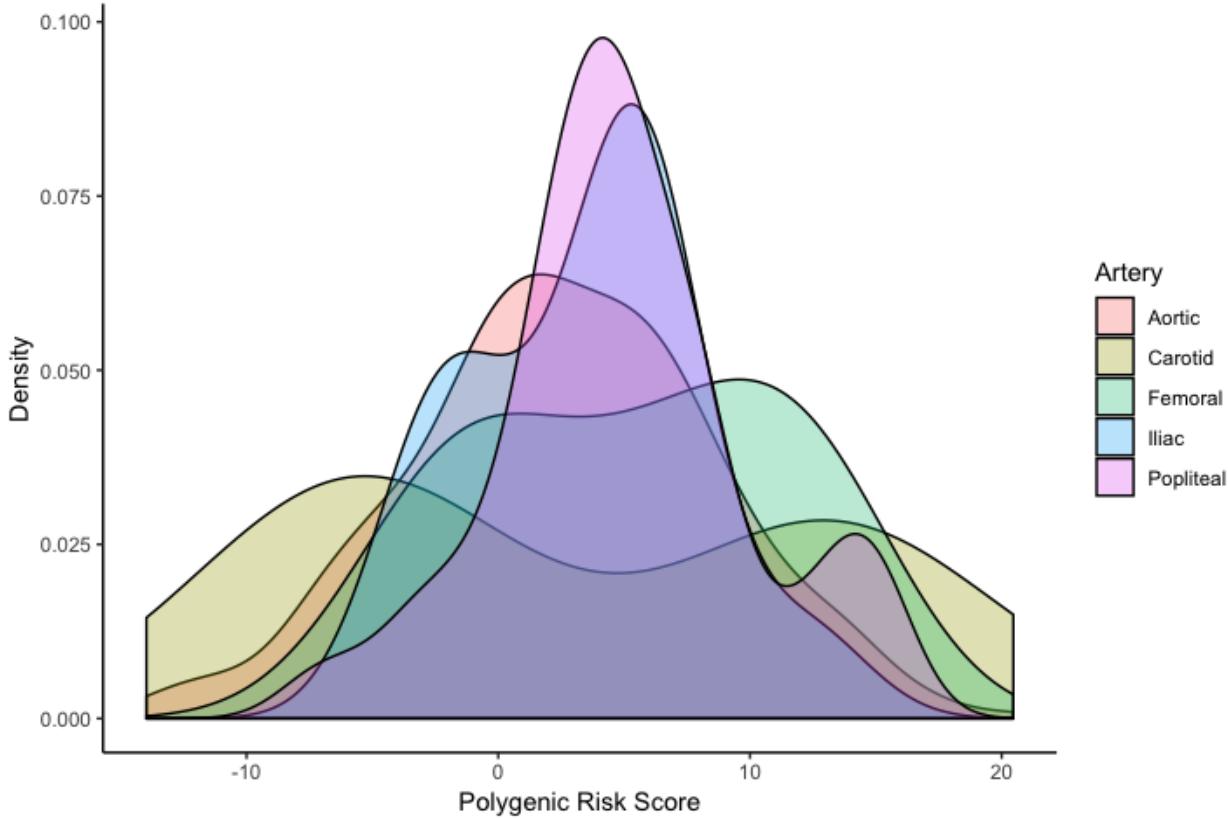

**Supplemental Figure 2.** Overlay density plot of polygenic risk score (PRS) for diameter per artery type. Distribution of PRS is comparable per artery type (*Kruskal-Wallis test*  $p$ -value = 0.135).

### Supplemental Table 1. Polygenic models.

A baseline model was constructed correcting for age, sex, ancestral background using four principal components, smoking status, and maximum diameter of the aneurysm sac or artery type if applicable.  $p_T$ : the GWAS p-value threshold of association.

| <b>Model</b>           | <b>Includes</b>                               |
|------------------------|-----------------------------------------------|
| GWAS                   | Baseline + GWAS hits $p_T < 5 \times 10^{-8}$ |
| $p < 5 \times 10^{-6}$ | Baseline + all SNPs $p_T < 5 \times 10^{-6}$  |
| $p < 5 \times 10^{-4}$ | Baseline + all SNPs $p_T < 5 \times 10^{-4}$  |
| $p < 0.001$            | Baseline + all SNPs $p_T < 0.001$             |
| $p < 0.01$             | Baseline + all SNPs $p_T < 0.01$              |
| $p < 0.05$             | Baseline + all SNPs $p_T < 0.05$              |
| $p < 0.1$              | Baseline + all SNPs $p_T < 0.1$               |
| $p < 0.2$              | Baseline + all SNPs $p_T < 0.2$               |
| $p < 0.5$              | Baseline + all SNPs $p_T < 0.5$               |

**Supplemental Table 2. Detailed polygenic risk score (PRS) models derived from AAA GWAS [12] for selected clinical phenotypes.**

| <b>Diameter of the aneurysm sac</b> |              |              |              |               |                |
|-------------------------------------|--------------|--------------|--------------|---------------|----------------|
| $p_T$                               | $R^2$        | $\beta$      | SE           | $p$ -value    | Number of SNPs |
| $5 \times 10^{-8}$                  | 0.001        | -1.932       | 2.143        | 0.368         | 1              |
| $5 \times 10^{-6}$                  | 0.000        | 0.075        | 1.419        | 0.958         | 3              |
| $5 \times 10^{-4}$                  | 0.001        | 0.371        | 0.431        | 0.390         | 24             |
| 0.001                               | 0.004        | 0.493        | 0.299        | 0.100         | 40             |
| 0.01                                | 0.018        | 0.394        | 0.116        | 0.001*        | 267            |
| <b>0.01015</b>                      | <b>0.019</b> | <b>0.398</b> | <b>0.115</b> | <b>0.001*</b> | <b>272</b>     |
| 0.05                                | 0.004        | 0.095        | 0.061        | 0.120         | 1,008          |
| 0.1                                 | 0.004        | 0.075        | 0.046        | 0.105         | 1,634          |
| 0.2                                 | 0.004        | 0.054        | 0.036        | 0.133         | 2,494          |
| 0.5                                 | 0.004        | 0.045        | 0.029        | 0.125         | 4,086          |
| <b>Artery type</b>                  |              |              |              |               |                |
| $p_T$                               | $R^2$        | $\beta$      | SE           | $p$ -value    | Number of SNPs |
| $5 \times 10^{-8}$                  | 0.005        | -0.886       | 0.681        | 0.193         | 1              |
| $5 \times 10^{-6}$                  | 0.003        | -0.382       | 0.411        | 0.353         | 3              |
| $5 \times 10^{-4}$                  | 0.000        | 0.055        | 0.138        | 0.688         | 24             |
| 0.001                               | 0.004        | 0.110        | 0.096        | 0.252         | 39             |
| <b>0.0022</b>                       | <b>0.007</b> | <b>0.099</b> | <b>0.063</b> | <b>0.114</b>  | <b>88</b>      |
| 0.01                                | 0.007        | 0.056        | 0.038        | 0.140         | 267            |
| 0.05                                | 0.030        | 0.020        | 0.020        | 0.321         | 1,008          |
| 0.1                                 | 0.001        | 0.006        | 0.014        | 0.652         | 1,632          |
| 0.2                                 | 0.000        | 0.000        | 0.012        | 0.989         | 2,493          |
| 0.5                                 | 0.000        | -0.001       | 0.009        | 0.950         | 4,086          |
| <b>Symptom status</b>               |              |              |              |               |                |
| $p_T$                               | $R^2$        | $\beta$      | SE           | $p$ -value    | Number of SNPs |
| $5 \times 10^{-8}$                  | 0.000        | 0.032        | 0.342        | 0.925         | 1              |
| $5 \times 10^{-6}$                  | 0.000        | 0.023        | 0.226        | 0.921         | 3              |
| $5 \times 10^{-4}$                  | 0.003        | 0.064        | 0.069        | 0.350         | 24             |
| 0.001                               | 0.001        | 0.025        | 0.049        | 0.604         | 39             |
| 0.01                                | 0.002        | 0.013        | 0.019        | 0.491         | 270            |
| 0.05                                | 0.002        | 0.007        | 0.010        | 0.483         | 1,009          |
| <b>0.0637</b>                       | <b>0.007</b> | <b>0.012</b> | <b>0.009</b> | <b>0.173</b>  | <b>1,213</b>   |
| 0.1                                 | 0.000        | 0.002        | 0.007        | 0.768         | 1,632          |
| 0.2                                 | 0.001        | 0.002        | 0.006        | 0.692         | 2,494          |
| 0.5                                 | 0.000        | 0.001        | 0.005        | 0.818         | 4,086          |

**Bold** indicates best fitted model, \* indicates  $p < 0.05$ .

*Abbreviations:*  $p_T$  =  $p$ -value threshold.  $\beta$  = beta coefficient. SE = standard error, SNPs = single nucleotide polymorphisms.

**Supplemental Table 3. Detailed polygenic risk score (PRS) models derived from attention deficit hyperactivity disorder GWAS [39] for selected clinical phenotypes.**

| <b>Diameter of the aneurysm sac</b>  |              |               |              |              |                |
|--------------------------------------|--------------|---------------|--------------|--------------|----------------|
| $p_T$                                | $R^2$        | $\beta$       | SE           | $p$ -value   | Number of SNPs |
| $5 \times 10^{-8}$                   | 0.003        | -0.973        | 0.714        | 0.174        | 10             |
| <b><math>5 \times 10^{-6}</math></b> | <b>0.004</b> | <b>-1.105</b> | <b>0.703</b> | <b>0.117</b> | <b>77</b>      |
| $5 \times 10^{-4}$                   | 0.000        | -0.256        | 0.710        | 0.719        | 1,179          |
| 0.001                                | 0.000        | 0.306         | 0.716        | 0.670        | 1,858          |
| 0.01                                 | 0.002        | -0.702        | 0.727        | 0.335        | 8,155          |
| 0.05                                 | 0.002        | -0.907        | 0.745        | 0.224        | 20,395         |
| 0.1                                  | 0.001        | -0.494        | 0.745        | 0.507        | 28,657         |
| 0.2                                  | 0.000        | -0.298        | 0.741        | 0.688        | 39,167         |
| 0.5                                  | 0.000        | -0.409        | 0.741        | 0.581        | 55,850         |
| <b>Artery type</b>                   |              |               |              |              |                |
| $p_T$                                | $R^2$        | $\beta$       | SE           | $p$ -value   | Number of SNPs |
| $5 \times 10^{-8}$                   | 0.000        | 0.086         | 0.230        | 0.707        | 10             |
| <b><math>5 \times 10^{-6}</math></b> | <b>0.010</b> | <b>-0.424</b> | <b>0.234</b> | <b>0.070</b> | <b>77</b>      |
| $5 \times 10^{-4}$                   | 0.001        | -0.168        | 0.240        | 0.486        | 1,179          |
| 0.001                                | 0.000        | -0.045        | 0.239        | 0.851        | 1,858          |
| 0.01                                 | 0.001        | -0.115        | 0.235        | 0.625        | 8,155          |
| 0.05                                 | 0.003        | -0.254        | 0.239        | 0.289        | 20,395         |
| 0.1                                  | 0.000        | -0.006        | 0.226        | 0.979        | 28,657         |
| 0.2                                  | 0.000        | -0.008        | 0.232        | 0.972        | 39,167         |
| 0.5                                  | 0.000        | -0.026        | 0.234        | 0.913        | 55,850         |
| <b>Symptom status</b>                |              |               |              |              |                |
| $p_T$                                | $R^2$        | $\beta$       | SE           | $p$ -value   | Number of SNPs |
| $5 \times 10^{-8}$                   | 0.000        | 0.028         | 0.115        | 0.809        | 10             |
| <b><math>5 \times 10^{-6}</math></b> | <b>0.010</b> | <b>-0.184</b> | <b>0.114</b> | <b>0.106</b> | <b>77</b>      |
| $5 \times 10^{-4}$                   | 0.001        | -0.070        | 0.113        | 0.533        | 1,179          |
| 0.001                                | 0.002        | -0.081        | 0.114        | 0.481        | 1,858          |
| 0.01                                 | 0.000        | -0.038        | 0.116        | 0.740        | 8,155          |
| 0.05                                 | 0.000        | -0.032        | 0.119        | 0.791        | 20,395         |
| 0.1                                  | 0.001        | -0.071        | 0.120        | 0.553        | 28,657         |
| 0.2                                  | 0.001        | -0.074        | 0.119        | 0.531        | 39,167         |
| 0.5                                  | 0.000        | -0.005        | 0.118        | 0.969        | 55,850         |

**Bold** indicates best fitted model, \* indicates  $p < 0.05$ .

*Abbreviations:*  $p_T$  =  $p$ -value threshold.  $\beta$  = beta coefficient. SE = standard error, SNPs = single nucleotide polymorphisms.

## Supplemental Table 4

### Supplemental Table 4.

Clinical characteristics of the upper 20<sup>th</sup> percentile and lower 80<sup>th</sup> percentile of PRS.

|                                                            | Lower 80 <sup>th</sup> of PRS<br>n = 332 | Upper 20 <sup>th</sup> of PRS<br>n = 83 | p                 |
|------------------------------------------------------------|------------------------------------------|-----------------------------------------|-------------------|
| <b>Male gender</b>                                         | 285 (81%)                                | 68 (19%)                                | .371 <sup>a</sup> |
| <b>Age at surgery,</b><br>median (range)                   | 69.5 (46-89)                             | 71.0 (28-87)                            | .460 <sup>b</sup> |
| <b>In-hospital days,</b><br>median (range)                 | 9 (1-81)                                 | 10 (1-65)                               | .216 <sup>b</sup> |
| <b>Any in-hospital reintervention<br/>post-operatively</b> | 37 (13%)                                 | 9 (12%)                                 | .747 <sup>a</sup> |
| <b>In-hospital death</b>                                   | 16 (6%)                                  | 3 (4%)                                  | .576 <sup>a</sup> |
| <b>Aneurysm</b>                                            |                                          |                                         |                   |
| Aortic                                                     | 281 (81%)                                | 69 (19%)                                | .311 <sup>a</sup> |
| Iliac                                                      | 8 (62%)                                  | 5 (39%)                                 |                   |
| Femoral                                                    | 7 (87%)                                  | 1 (13%)                                 |                   |
| Popliteal                                                  | 28 (80%)                                 | 7 (20%)                                 |                   |
| Carotid                                                    | 8 (89%)                                  | 1 (11%)                                 |                   |
| <b>IL-6*</b> , mean±sd                                     | 4.0 ± 1.8                                | 3.7 ± 2.3                               | .321 <sup>c</sup> |
| <b>IL-8*</b>                                               | 4.6 ± 1.5                                | 4.1 ± 1.6                               | .051 <sup>c</sup> |
| <b>MCP-1*</b>                                              | 1.9 ± 2.1                                | 1.8 ± 2.0                               | .782 <sup>c</sup> |
| <b>OPG*</b>                                                | 8.3 ± 1.0                                | 8.3 ± 1.0                               | .964 <sup>c</sup> |

*Abbreviations:* PRS = polygenic risk score, IL = interleukin, sd = standard deviation, MCP = monocyte chemotactic protein, OPG = osteoprotegerin. \* natural log transformed, all inflammatory markers are extracted from the tissue sample, analyzed by Luminex and corrected for inter assay variability with pooled and blank sample.

<sup>a</sup> Chi-squared test, <sup>b</sup> Mann-Whitney U test, <sup>c</sup> Student's T-test.

## Supplemental Table 5

### Supplemental Table 5.

AAA associated SNPs reported by GWAS and the association results for artery type and symptom status.

| Reported by literature |     |           |                                     |         |       |                    |                        | This study  |         |       |       |                |         |       |       |
|------------------------|-----|-----------|-------------------------------------|---------|-------|--------------------|------------------------|-------------|---------|-------|-------|----------------|---------|-------|-------|
| SNP                    | Chr | BP        | Near(est)<br>gene(s)                | Alleles | EAF   | $\beta^a$          | $p$                    | Artery type |         |       |       | Symptom status |         |       |       |
|                        |     |           |                                     |         |       |                    |                        | EAF         | $\beta$ | SE    | $p$   | EAF            | $\beta$ | SE    | $p$   |
| rs602633               | 1   | 109821511 | <i>PSRC1-<br/>CELSR2-<br/>SORT1</i> | T* - G  | 0.199 | -0.129             | $6.58 \times 10^{-9}$  | 0.208       | 0.034   | 0.306 | 0.911 | 0.208          | -0.694  | 0.192 | 0.132 |
| rs4129267              | 1   | 154426264 | <i>IL6R</i>                         | T* - C  | 0.370 | -0.132             | $4.76 \times 10^{-13}$ | 0.355       | 0.173   | 0.270 | 0.522 | 0.361          | 0.564   | 0.171 | 0.133 |
| rs1795061              | 1   | 214409280 | <i>SMYD2</i>                        | T* - C  | 0.337 | 0.123              | $8.80 \times 10^{-11}$ | 0.307       | 0.149   | 0.276 | 0.591 | 0.315          | -0.550  | 0.165 | 0.125 |
| rs10757274             | 9   | 22096055  | <i>CDKN2BAS<br/>1/ANRIL</i>         | A* - G  | 0.462 | -0.216             | $1.54 \times 10^{-33}$ | 0.504       | -0.015  | 0.263 | 0.955 | 0.506          | -0.377  | 0.160 | 0.276 |
| rs10985349             | 9   | 124425243 | <i>DAB2IP</i>                       | T* - C  | 0.195 | 0.158              | $2.40 \times 10^{-11}$ | 0.200       | -0.015  | 0.339 | 0.964 | 0.204          | 0.149   | 0.200 | 0.711 |
| rs1466535              | 12  | 57534470  | <i>LRP1</i>                         | G* - A  | 0.679 | 0.199 <sup>b</sup> | $9.99 \times 10^{-7}$  | 0.655       | 0.039   | 0.267 | 0.885 | 0.655          | -0.255  | 0.166 | 0.124 |
| rs9316871              | 13  | 22861921  | <i>LINC00540</i>                    | A* - G  | 0.201 | -0.136             | $4.75 \times 10^{-10}$ | 0.796       | 0.176   | 0.348 | 0.613 | 0.794          | 0.037   | 0.197 | 0.930 |
| rs6511720              | 19  | 11202306  | <i>LDLR</i>                         | T* - G  | 0.096 | -0.218             | $7.90 \times 10^{-14}$ | 0.094       | 0.306   | 0.469 | 0.514 | 0.098          | 0.069   | 0.273 | 0.902 |
| rs3827066              | 20  | 44586023  | <i>PCIF1-<br/>ZNF335-<br/>MMP9</i>  | T* - C  | 0.179 | 0.201              | $2.13 \times 10^{-17}$ | 0.167       | 0.190   | 0.345 | 0.583 | 0.176          | -0.879  | 0.207 | 0.048 |
| rs2836411              | 21  | 39819830  | <i>ERG</i>                          | T* - C  | 0.369 | 0.107              | $5.80 \times 10^{-9}$  | 0.361       | 0.433   | 0.311 | 0.164 | 0.364          | -0.500  | 0.194 | 0.224 |

*Abbreviations:* AAA = abdominal aortic aneurysm, SNP = single nucleotide polymorphism, Chr = chromosome, BP = base pair, EAF = effect allele frequency,  $\beta$  = beta-coefficient, SE = standard error.

\* Effect allele, <sup>a</sup>  $\beta$  converted from combined odds ratio's (discovery and validation phase) of summary statistics of *Jones et al.(2017)* [12].

<sup>b</sup>  $\beta$  converted from discovery phase of summary statistics of *Bown et al. (2011)* [7].
